# Supplementary material
Source: PubMed Central journal article supplement (PMC4807736)
Supplement: NIHMS763920-supplement-Supplemental_Figure_and_Tables.pdf [file NIHMS763920-supplement-Supplemental_Figure_and_Tables.pdf]

## **SUPPLEMENTAL MATERIAL**

### **Heart failure and mid-range ejection fraction: Implications of recovered ejection fraction for exercise tolerance and outcomes**

Short title: *Nadruz et al; Mid-EF Heart Failure*

Wilson Nadruz Junior, MD, PhD<sup>1,2</sup>; Erin West, MSc<sup>1</sup>; Mário Santos, MD<sup>3</sup>; Hicham Skali, MD, MSc<sup>1</sup>; John D. Groarke MBBCh, MPH<sup>1</sup>; Daniel E. Forman MD<sup>4</sup>; Amil M. Shah, MD, MPH<sup>1</sup>

**Supplemental Table 1.** Forward stepwise Cox regression analysis for death including all baseline clinical and treatment variables that showed significant differences among the studied groups in univariate analysis.

| <b>Variable</b>            | <b>Hazard ratio [95% confidence interval]</b> | <b>p</b> |
|----------------------------|-----------------------------------------------|----------|
| Glomerular filtration rate | 0.99 [0.99-0.99]                              | <0.001   |
| Coronary artery disease    | 2.05 [1.44-2.94]                              | <0.001   |
| Diabetes mellitus          | 1.84 [1.32-2.57]                              | <0.001   |
| Pacemaker                  | 1.71 [1.23-2.37]                              | 0.001    |
| Post-chemotherapy          | 2.18 [1.33-3.57]                              | 0.001    |
| Diuretics use              | 2.06 [1.29-3.29]                              | 0.003    |
| ACEI/ARB use               | 0.65 [0.45-0.93]                              | 0.017    |
| Hemoglobin                 | 0.89 [0.81-0.97]                              | 0.012    |
| White race                 | 1.79 [1.09-2.92]                              | 0.021    |
| Statins use                | 0.66 [0.46-2.92]                              | 0.021    |

Legend. Only variables that showed significant association are shown.

ACEI/ARB – angiotensin converting enzyme inhibitor or angiotensin receptor blocker.

**Supplemental Table 2.** Forward stepwise Cox regression analysis for the composite endpoint including all baseline clinical and treatment variables that showed significant differences among the studied groups.

| <b>Variable</b>             | <b>Hazard ratio [95% confidence interval]</b> | <b>p</b> |
|-----------------------------|-----------------------------------------------|----------|
| Glomerular filtration rate  | 0.99 [0.98-0.99]                              | <0.001   |
| Diuretics use               | 2.32 [1.56-3.45]                              | <0.001   |
| Aldosterone antagonists use | 1.61 [1.23-2.09]                              | <0.001   |
| ACEI/ARB use                | 0.65 [1.56-3.45]                              | 0.004    |
| Coronary artery disease     | 1.46 [1.12-1.90]                              | 0.005    |
| Anticoagulation             | 1.46 [1.12-1.89]                              | 0.005    |
| Post-chemotherapy           | 1.59 [1.03-2.46]                              | 0.037    |

Legend. Only variables that showed significant association are shown. The composite endpoint was defined as the composite outcome of left ventricular assistant device implantation, heart transplantation or all-cause mortality.

ACEI/ARB – angiotensin converting enzyme inhibitors or angiotensin receptor blockers.

**Supplemental Table 3:** Age-adjusted baseline cardiopulmonary exercise testing features of study participants.

| Variables                        | <b>HFrEF</b><br>n=620 (66%) | <b>HFm-recEF</b><br>n=170 (18%) | <b>HFmEF</b><br>n=107 (11%) | <b>HFpEF</b><br>n=47 (5%) |
|----------------------------------|-----------------------------|---------------------------------|-----------------------------|---------------------------|
| <i>Ventilatory</i>               |                             |                                 |                             |                           |
| Peak VO <sub>2</sub> , mL/min/Kg | 14.4 ± 0.2                  | 17.5 ± 0.4*                     | 17.1 ± 0.5*                 | 15.9 ± 0.8                |
| VE/VCO <sub>2</sub> Slope        | 34.4 ± 0.3                  | 29.3 ± 0.6*                     | 30.7 ± 0.8*                 | 30.5 ± 1.2*               |
| <i>Hemodynamic</i>               |                             |                                 |                             |                           |
| Resting HR, bpm                  | 74.2 ± 0.6                  | 68.7 ± 1.1*                     | 69.4 ± 1.3*                 | 71.2 ± 2.0                |
| Peak HR, bpm                     | 121.5 ± 1.0                 | 129.2 ± 1.9*                    | 123.8 ± 2.4                 | 121.7 ± 3.7               |
| Chronotropic index               | 0.52 ± 0.01                 | 0.63 ± 0.02*                    | 0.57 ± 0.03                 | 0.53 ± 0.4†               |
| Resting SBP, mmHg                | 114.0 ± 0.8                 | 121.6 ± 1.4*                    | 120.3 ± 1.8*                | 126.9 ± 2.8*‡             |
| Peak SBP, mmHg                   | 134.9 ± 1.1                 | 151.8 ± 2.1*                    | 151.6 ± 2.7*                | 156.2 ± 4.2*              |
| Resting DBP, mmHg                | 73.5 ± 0.5                  | 75.4 ± 0.9                      | 73.8 ± 1.1                  | 74.5 ± 1.7                |
| Peak DBP, mmHg                   | 74.4 ± 0.5                  | 77.2 ± 0.9*                     | 76.0 ± 1.2                  | 76.1 ± 1.9                |
| Peak RER                         | 1.19 ± 0.01                 | 1.20 ± 0.01                     | 1.20 ± 0.01                 | 1.15 ± 0.02†              |

**Legend.** \*p<0.05 compared to HFrEF; † p<0.05 compared to HFm-recEF; ‡ p<0.05 compared to HFmEF. Data are presented as mean ± standard error of the mean.

HFrEF – HF with reduced LVEF; HFm-recEF – HF with mid-range and recovered LVEF; HFmEF – HF with mid-range and without recovered LVEF; HFpEF – heart failure with preserved LVEF; LVEF- left ventricular ejection fraction; DBP – diastolic blood pressure; HR – heart rate; RER - respiratory exchange ratio; SBP – systolic blood pressure; VE/VCO<sub>2</sub> - minute ventilation-carbon dioxide production relationship; VO<sub>2</sub> – oxygen consumption.

**Supplemental Table 4.** Features of heart failure with mid-range and recovered left ventricular ejection fraction (HFm-recEF) patients according to change in left ventricular ejection fraction

| Variables                          | $\Delta$ LVEF   | $\Delta$ LVEF    | $\Delta$ LVEF    | P for trend |
|------------------------------------|-----------------|------------------|------------------|-------------|
|                                    | < -7%           | -7 to +7%        | > +7%            |             |
|                                    | n=20 (16%)      | n=78 (64%)       | n=25 (20%)       |             |
| <i>LVEF, %</i>                     |                 |                  |                  |             |
| Baseline                           | 50 [45, 55]     | 48 [44, 50]      | 40 [40, 47]      | <0.001      |
| Follow-up                          | 34 [25, 40]     | 46 [43, 52]      | 57 [54, 60]      | <0.001      |
| <i>Baseline Clinical features</i>  |                 |                  |                  |             |
| Age, years                         | 57.1 $\pm$ 15.1 | 51.5 $\pm$ 12.3  | 44.6 $\pm$ 11.6  | 0.001       |
| Male gender, n(%)                  | 14 (70)         | 47 (60)          | 12 (48)          | 0.13        |
| White, n(%)                        | 16 (80)         | 65 (83)          | 21 (84)          | 0.74        |
| Body mass index, kg/m <sup>2</sup> | 29.9 $\pm$ 5.5  | 28.66 $\pm$ 6.62 | 28.93 $\pm$ 6.97 | 0.67        |
| Ischemic cardiomyopathy, n(%)      | 3 (15)          | 8 (10)           | 0 (0)            | 0.07        |
| Post-Chemotherapy, n(%)            | 2 (10)          | 8 (10)           | 4 (16)           | 0.50        |
| Symptomatic heart failure, n(%)    | 15 (75)         | 56 (72)          | 19 (76)          | 0.91        |
| Hypertension, n(%)                 | 16 (80)         | 39 (50)          | 10 (40)          | 0.009       |
| Diabetes mellitus, n(%)            | 5 (25)          | 14 (18)          | 4 (16)           | 0.46        |
| Coronary artery disease, n(%)      | 5 (25)          | 13 (17)          | 4 (16)           | 0.46        |
| Atrial Fibrillation, n(%)          | 5 (25)          | 26 (33)          | 3 (12)           | 0.26        |
| COPD, n(%)                         | 3 (15)          | 8 (10)           | 0 (0)            | 0.07        |
| Estimated GFR, mL/min              | 60.8 $\pm$ 29.4 | 85.9 $\pm$ 20.7  | 89.7 $\pm$ 26.0  | <0.001      |
| Hemoglobin, g/dL                   | 13.0 $\pm$ 1.6  | 13.8 $\pm$ 1.5   | 13.5 $\pm$ 1.7   | 0.39        |
| <i>Baseline treatment features</i> |                 |                  |                  |             |
| CRT/ICD, n(%)                      | 3 (15)          | 21 (27)          | 5 (20)           | 0.77        |
| Pacemaker, n(%)                    | 3 (15)          | 23 (30)          | 5 (20)           | 0.80        |
| Beta-blockers, n(%)                | 17 (85)         | 66 (85)          | 20 (80)          | 0.63        |
| ACEI/ARB, n(%)                     | 19 (95)         | 67 (86)          | 21 (84)          | 0.30        |
| Aldosterone antagonists, n(%)      | 5 (25)          | 18 (23)          | 3 (12)           | 0.27        |
| Diuretics, n(%)                    | 13 (65)         | 37 (47)          | 12 (48)          | 0.30        |
| Calcium channel blockers, n(%)     | 4 (20)          | 7 (9)            | 1 (4)            | 0.08        |
| Anticoagulation, n(%)              | 5 (25)          | 21 (27)          | 3 (12)           | 0.27        |

|                                  |              |              |              |      |
|----------------------------------|--------------|--------------|--------------|------|
| Antiplatelets, n(%)              | 11 (55)      | 27 (35)      | 7 (28)       | 0.07 |
| Antiarrhythmics, n(%)            | 3 (15)       | 22 (28)      | 3 (12)       | 0.69 |
| Statins, n(%)                    | 8 (40)       | 32 (41)      | 10 (40)      | 0.99 |
| <i>Baseline CPET features</i>    |              |              |              |      |
| Peak VO <sub>2</sub> , mL/min/Kg | 16.7 ± 5.0   | 18.7 ± 7.1   | 18.0 ± 4.8   | 0.56 |
| % Predicted Peak VO <sub>2</sub> | 70.2 ± 18.0  | 72.0 ± 20.3  | 70.0 ± 18.7  | 0.93 |
| VE/VCO <sub>2</sub> Slope        | 28.9 ± 5.5   | 29.2 ± 6.5   | 27.0 ± 4.4   | 0.24 |
| Resting HR, bpm                  | 68.3 ± 12.9  | 68.5 ± 13.4  | 69.1 ± 11.4  | 0.83 |
| Peak HR, bpm                     | 125.8 ± 28.2 | 132.2 ± 23.9 | 138.0 ± 24.5 | 0.10 |
| Chronotropic index               | 0.61 ± 0.26  | 0.64 ± 0.23  | 0.66 ± 0.24  | 0.50 |
| Resting SBP, mmHg                | 124.4 ± 17.2 | 121.0 ± 20.9 | 118.1 ± 18.5 | 0.29 |
| Peak SBP, mmHg                   | 154.8 ± 19.6 | 151.7 ± 29.7 | 152.5 ± 25.7 | 0.80 |
| Resting DBP, mmHg                | 74.9 ± 9.5   | 75.4 ± 11.5  | 72.7 ± 13.0  | 0.48 |
| Peak DBP, mmHg                   | 76.4 ± 8.8   | 78.2 ± 11.8  | 78.5 ± 13.7  | 0.58 |
| Peak RER                         | 1.19 ± 0.12  | 1.21 ± 0.11  | 1.24 ± 0.16  | 0.14 |

Legend. Data are presented as mean ± standard deviation for normally distributed continuous variables and median [25<sup>th</sup>,75<sup>th</sup> percentile] for non-normally distributed continuous variables.

ΔLVEF – change in follow-up LVEF compared to baseline LVEF; ACEI/ARB – angiotensin converting enzyme inhibitor or angiotensin receptor blocker; COPD – chronic obstructive pulmonary disease; CRT/ICD - cardiac resynchronization therapy and/or implantable cardioverter defibrillator; GFR – glomerular filtration rate; LVEF - left ventricular ejection fraction; DBP – diastolic blood pressure; HR – heart rate; RER - respiratory exchange ratio; SBP – systolic blood pressure; VE/VCO<sub>2</sub> - minute ventilation-carbon dioxide production relationship; VO<sub>2</sub> – oxygen consumption.

**Supplemental Table 5.** Features of heart failure with mid-range and without recovered left ventricular ejection fraction (HFmEF) patients according to change in left ventricular ejection fraction

| Variables                          | $\Delta$ LVEF | $\Delta$ LVEF | $\Delta$ LVEF | P for trend |
|------------------------------------|---------------|---------------|---------------|-------------|
|                                    | < -7%         | -7 to +7%     | > +7%         |             |
|                                    | n=9 (12%)     | n=48 (61%)    | n=21 (27%)    |             |
| <i>LVEF, %</i>                     |               |               |               |             |
| Baseline                           | 50 [45, 50]   | 50 [45, 55]   | 45 [40, 55]   | 0.09        |
| Follow-up                          | 33 [30, 35]   | 50 [45, 55]   | 55 [55, 65]   | <0.001      |
| <i>Baseline Clinical features</i>  |               |               |               |             |
| Age, years                         | 49.4 ± 18.3   | 53.4 ± 14.8   | 51.5 ± 16.0   | 0.92        |
| Male gender, n(%)                  | 4 (44)        | 25 (52)       | 12 (57)       | 0.53        |
| White, n(%)                        | 7 (78)        | 46 (96)       | 19 (91)       | 0.52        |
| Body mass index, kg/m <sup>2</sup> | 28.9 ± 9.7    | 28.8 ± 6.3    | 30.5 ± 6.6    | 0.41        |
| Ischemic cardiomyopathy, n(%)      | 1 (11)        | 6 (13)        | 2 (10)        | 0.82        |
| Post-Chemotherapy, n(%)            | 0 (0)         | 11 (23)       | 4 (19)        | 0.42        |
| Symptomatic heart failure, n(%)    | 7 (78)        | 31 (65)       | 16 (76)       | 0.82        |
| Hypertension, n(%)                 | 4 (44)        | 26 (54)       | 12 (57)       | 0.57        |
| Diabetes mellitus, n(%)            | 3 (33)        | 11 (23)       | 2 (10)        | 0.11        |
| Coronary artery disease, n(%)      | 2 (22)        | 12 (25)       | 6 (29)        | 0.69        |
| Atrial Fibrillation, n(%)          | 3 (33)        | 11 (23)       | 5 (24)        | 0.69        |
| COPD, n (%)                        | 1 (11)        | 5 (10)        | 1 (5)         | 0.48        |
| Estimated GFR, mL/min              | 79.9 ± 28.0   | 75.7 ± 23.5   | 85.9 ± 22.7   | 0.30        |
| Hemoglobin, g/dL                   | 12.3 ± 2.1    | 13.4 ± 1.8    | 13.4 ± 2.3    | 0.28        |
| <i>Baseline treatment features</i> |               |               |               |             |
| CRT/ICD, n(%)                      | 3 (33)        | 6 (13)        | 3 (14)        | 0.34        |
| Pacemaker, n(%)                    | 3 (33)        | 6 (13)        | 5 (24)        | 0.94        |
| Beta-blockers, n(%)                | 8 (89)        | 30 (63)       | 16 (76)       | 0.90        |
| ACEI/ARB, n(%)                     | 7 (78)        | 27 (56)       | 11 (52)       | 0.27        |
| Aldosterone antagonists, n(%)      | 1 (11)        | 6 (13)        | 2 (10)        | 0.82        |
| Diuretics, n(%)                    | 4 (44)        | 16 (33)       | 11 (52)       | 0.40        |
| Calcium channel blockers, n(%)     | 2 (22)        | 11 (23)       | 3 (14)        | 0.50        |
| Anticoagulation, n(%)              | 3 (33)        | 9 (19)        | 3 (14)        | 0.28        |

|                                  |              |              |              |      |
|----------------------------------|--------------|--------------|--------------|------|
| Antiplatelets, n(%)              | 4 (44.4)     | 20 (42)      | 6 (29)       | 0.32 |
| Antiarrhythmics, n(%)            | 1 (11)       | 2 (4)        | 2 (10)       | 0.86 |
| Statins, n(%)                    | 2 (22)       | 16 (33)      | 7 (33)       | 0.65 |
| <i>Baseline CPET features</i>    |              |              |              |      |
| Peak VO <sub>2</sub> , mL/min/Kg | 20.4 ± 13.0  | 18.6 ± 8.7   | 16.0 ± 8.9   | 0.19 |
| % Predicted Peak VO <sub>2</sub> | 76.0 ± 25.7  | 75.5 ± 24.1  | 62.3 ± 19.8  | 0.06 |
| VE/VCO <sub>2</sub> Slope        | 29.4 ± 4.9   | 30.3 ± 6.4   | 29.7 ± 4.2   | 0.94 |
| Resting HR, bpm                  | 65.4 ± 16.4  | 70.9 ± 14.8  | 68.8 ± 14.7  | 0.81 |
| Peak HR, bpm                     | 125.8 ± 34.4 | 132.0 ± 31.5 | 121.5 ± 29.2 | 0.47 |
| Chronotropic index               | 0.56 ± 0.25  | 0.65 ± 0.31  | 0.51 ± 0.22  | 0.35 |
| Resting SBP, mmHg                | 121.1 ± 25.4 | 115.5 ± 17.6 | 127.0 ± 20.3 | 0.17 |
| Peak SBP, mmHg                   | 148.9 ± 31.0 | 152.3 ± 32.3 | 147.3 ± 29.6 | 0.75 |
| Resting DBP, mmHg                | 72.5 ± 9.1   | 72.2 ± 12.2  | 76.8 ± 9.5   | 0.19 |
| Peak DBP, mmHg                   | 71.7 ± 16.3  | 75.3 ± 13.0  | 76.7 ± 10.5  | 0.39 |
| Peak RER                         | 1.17 ± 0.10  | 1.21 ± 0.12  | 1.18 ± 0.13  | 0.14 |

Legend. Data are presented as mean ± standard deviation for normally distributed continuous variables and median [25<sup>th</sup>,75<sup>th</sup> percentile] for non-normally distributed continuous variables.

ΔLVEF – change in follow-up LVEF compared to baseline LVEF; ACEI/ARB – angiotensin converting enzyme inhibitor or angiotensin receptor blocker; COPD – chronic obstructive pulmonary disease; CRT/ICD - cardiac resynchronization therapy and/or implantable cardioverter defibrillator; GFR – glomerular filtration rate; LVEF- left ventricular ejection fraction; DBP – diastolic blood pressure; HR – heart rate; RER - respiratory exchange ratio; SBP – systolic blood pressure; VE/VCO<sub>2</sub> - minute ventilation-carbon dioxide production relationship; VO<sub>2</sub> – oxygen consumption.



**Supplemental Table 6.** Characteristics of heart failure patients from the Brigham and Women’s Hospital and from other studies that enrolled chronic heart failure patients.

| Variables                   | Cardiovascular Health Study <sup>1</sup> |         |       | CHARM <sup>2</sup> |         |       | He et al <sup>3</sup> |         |       | Brigham and Women’s Hospital |           |        |       |
|-----------------------------|------------------------------------------|---------|-------|--------------------|---------|-------|-----------------------|---------|-------|------------------------------|-----------|--------|-------|
|                             | HFrEF                                    | HFmidEF | HFpEF | HFrEF <sup>4</sup> | HFmidEF | HFpEF | HFrEF                 | HFmidEF | HFpEF | HFrEF                        | HFm-recEF | HFmEF  | HFpEF |
| LVEF cut-off                | <45%                                     | 45–54%  | ≥55%  | ≤40%               | 43–52%  | >52%  | <40%                  | 40–55%  | >55%  | <40%                         | 40–55%    | 40–55% | >55%  |
| n                           | 60                                       | 39      | 170   | 4576               | 1295    | 1500  | 98                    | 38      | 128   | 620                          | 170       | 107    | 47    |
| Mean age, years             | 74                                       | 73      | 75    | 65                 | 66      | 67    | 62                    | 66      | 72    | 55                           | 52        | 54     | 63    |
| Men, %                      | 63                                       | 49      | 44    | 74                 | 68      | 51    | 75                    | 79      | 65    | 73                           | 61        | 55     | 49    |
| Mean BMI, kg/m <sup>2</sup> |                                          |         |       |                    |         |       | 24                    | 25      | 25    | 28                           | 29        | 29     | 32    |
| Mean HR, bpm                |                                          |         |       | 74                 | 71      | 71    | 77                    | 69      | 71    | 74                           | 69        | 70     | 70    |
| Mean SBP, mmHg              | 127                                      | 136     | 138   | 127                | 135     | 138   | 126                   | 141     | 139   | 114                          | 121       | 120    | 129   |
| Mean DBP, mmHg              | 66                                       | 68      | 68    | 76                 | 78      | 77    | 76                    | 79      | 76    | 74                           | 75        | 74     | 75    |
| Hypertension, %             | 57                                       | 72      | 59    | 49                 | 60      | 70    | 54                    | 77      | 88    | 59                           | 51        | 58     | 77    |
| CAD/MI, %                   | 78                                       | 69      | 58    | 65-75              | 72      | 62    | 51                    | 65      | 63    | 41                           | 21        | 26     | 30    |
| Diabetes, %                 | 23                                       | 36      | 27    | 29                 | 27      | 28    | 41                    | 48      | 33    | 29                           | 16        | 21     | 32    |
| Atrial fibrillation, %      |                                          |         |       |                    |         |       | 10                    | 8       | 26    | 35                           | 27        | 28     | 38    |
| Hemoglobin, g/dL            |                                          |         |       |                    |         |       | 13.4                  | 14.5    | 13.5  | 13.6                         | 13.5      | 13.0   | 12.8  |
| ACE inhibitors, %           | 42                                       | 28      | 25    | 56                 | 21      | 17    | 50                    | 45      | 37    | 64                           | 65        | 42     | 49    |

|                     |    |    |    |    |    |    |    |    |    |    |    |    |    |
|---------------------|----|----|----|----|----|----|----|----|----|----|----|----|----|
| ARB, %              |    |    |    |    |    |    | 4  | 23 | 11 | 19 | 21 | 14 | 15 |
| Beta-blockers, %    | 7  | 8  | 17 | 55 | 57 | 54 | 39 | 58 | 55 | 90 | 85 | 68 | 62 |
| Aldosterone ant., % |    |    |    | 20 | 11 | 12 |    |    |    | 36 | 22 | 14 | 4  |
| Diuretics, %        | 78 | 74 | 59 | 88 | 64 | 63 | 67 | 56 | 37 | 76 | 47 | 45 | 72 |
| CCB, %              | 30 | 46 | 31 | 13 | 26 | 37 | 26 | 39 | 57 | 4  | 8  | 25 | 23 |
| Lipid lowering, %   | 2  | 3  | 5  | 41 | 43 | 40 |    |    |    | 52 | 43 | 38 | 45 |

**Legend.** HF<sub>r</sub>EF – heart failure (HF) with reduced left ventricular ejection fraction (LVEF); HF<sub>mid</sub>EF – HF with mid-range LVEF; HF<sub>p</sub>EF – HF with preserved LVEF; HF<sub>m-rec</sub>EF – HF with mid-range LVEF and recovered LVEF; HF<sub>m</sub>EF – HF with mid-range LVEF without recovered LVEF. CHARM - Candesartan in Heart Failure Assessment of Reduction in Mortality and Morbidity. BMI – body mass index; HR – heart rate; SBP – systolic blood pressure; DBP – diastolic blood pressure; CAD – coronary artery disease; MI – myocardial infarction; ACE – angiotensin-converting enzyme; ARB – angiotensin receptor blockers; Aldosterone ant. – aldosterone antagonists; CCB – calcium channel blockers.

<sup>1</sup>Gottdiener JS, et al. Outcome of congestive heart failure in elderly persons: influence of left ventricular systolic function. The Cardiovascular Health Study. *Ann Intern Med* 2002;137:631–9. <sup>2</sup>Solomon SD, et al. Influence of ejection fraction on cardiovascular outcomes in a broad spectrum of heart failure patients. *Circulation*. 2005;112:3738-44. <sup>3</sup>He KL, et al. Comparison of ventricular structure and function in Chinese patients with heart failure and ejection fractions >55% versus 40% to 55% versus <40%. *Am J Cardiol* 2009;103:845–51. <sup>4</sup>Young JB, et al. Mortality and morbidity reduction with Candesartan in patients with chronic heart failure and left ventricular systolic dysfunction: results of the CHARM low-left ventricular ejection fraction trials. *Circulation*. 2004;110:2618-26.

**Supplemental Table 7.** Characteristics of heart failure patients from the Brigham and Women’s Hospital and from other studies that enrolled acutely-decompensated heart failure patients.

| Variables                       | OPTIMIZE-HF <sup>1</sup> |         |       | ADHERE <sup>2</sup> |         |       | ASCEND-HF <sup>3</sup> |         |       | Brigham and Women’s Hospital |           |        |       |
|---------------------------------|--------------------------|---------|-------|---------------------|---------|-------|------------------------|---------|-------|------------------------------|-----------|--------|-------|
|                                 | HFrEF                    | HFmidEF | HFpEF | HFrEF*              | HFmidEF | HFpEF | HFrEF                  | HFmidEF | HFpEF | HFrEF                        | HFm-recEF | HFmEF  | HFpEF |
| LVEF cut-off                    | <40%                     | 40–50%  | >50%  | ≤40%                | 40–55%  | ≥55%  | <40%                   | 40–50%  | >50%  | <40%                         | 40–55%    | 40–55% | >55%  |
| n                               | 20118                    | 7321    | 10070 | 40796               | 17045   | 17022 | 4474                   | 674     | 539   | 620                          | 170       | 107    | 47    |
| Mean age, years                 | 70                       | 74      | 76    | 70                  | 74      | 74    | 64                     | 73      | 76    | 55                           | 52        | 54     | 63    |
| Men, %                          | 62                       | 48      | 32    | 61                  | 46      | 31    | 71                     | 59      | 42    | 73                           | 61        | 55     | 49    |
| Mean BMI, kg/m <sup>2</sup>     | 39                       | 44      | 41    | 28                  | 30      | 31    |                        |         |       | 28                           | 29        | 29     | 32    |
| Mean HR, bpm                    | 89                       | 86      | 84    |                     |         |       | 83                     | 78      | 74    | 74                           | 69        | 70     | 70    |
| Mean SBP, mmHg                  | 135                      | 147     | 150   | 136                 | 150     | 152   | 120                    | 130     | 132   | 114                          | 121       | 120    | 129   |
| Mean DBP, mmHg                  | 77                       | 77      | 75    | 78                  | 79      | 77    | 75                     | 72      | 70    | 74                           | 75        | 74     | 75    |
| Hypertension, %                 | 66                       | 74      | 77    |                     |         |       | 68                     | 82      | 89    | 59                           | 51        | 58     | 77    |
| CAD/MI, %                       | 54                       | 49      | 32    | 63                  | 60      | 47    | 63                     | 69      | 60    | 41                           | 21        | 26     | 30    |
| Diabetes, %                     | 41                       | 48      | 33    | 42                  | 48      | 44    | 42                     | 50      | 51    | 29                           | 16        | 21     | 32    |
| Atrial fibrillation, %          |                          |         |       | 29                  | 33      | 32    | 32                     | 50      | 55    | 35                           | 27        | 28     | 38    |
| Hemoglobin, g/dL                | 12.5                     | 11.9    | 11.8  |                     |         |       | 12.8                   | 12.3    | 11.6  | 13.6                         | 13.5      | 13.0   | 12.8  |
| eGFR, mL/min/1.73m <sup>2</sup> |                          |         |       |                     |         |       | 69                     | 54      | 51    | 72                           | 82        | 75     | 67    |

|                     |                |                |                 |    |    |    |                 |                 |                 |    |    |    |    |
|---------------------|----------------|----------------|-----------------|----|----|----|-----------------|-----------------|-----------------|----|----|----|----|
| ACE inhibitors, %   | 45             | 38             | 34              | 66 | 57 | 51 | 63 <sup>‡</sup> | 61 <sup>‡</sup> | 60 <sup>‡</sup> | 64 | 65 | 42 | 49 |
| ARB, %              | 11             | 12             | 14              | 13 | 15 | 16 |                 |                 |                 | 19 | 21 | 14 | 15 |
| Beta-blockers, %    | 56             | 54             | 50              | 67 | 62 | 55 | 59              | 65              | 67              | 90 | 85 | 68 | 62 |
| Aldosterone ant., % | 10             | 6              | 4               |    |    |    | 33              | 21              | 13              | 36 | 22 | 14 | 4  |
| Diuretics, %        | 63             | 59             | 57              |    |    |    | 95              | 97              | 96              | 76 | 47 | 45 | 72 |
| CCB, %              | 5 <sup>†</sup> | 9 <sup>†</sup> | 11 <sup>†</sup> |    | 31 | 39 |                 |                 |                 | 4  | 8  | 25 | 23 |
| Lipid lowering, %   | 40             | 41             | 37              | 36 | 36 | 31 |                 |                 |                 | 52 | 43 | 38 | 45 |
| Pacemaker, %        |                |                |                 |    |    |    | 1               | 1               | 1               | 55 | 28 | 22 | 13 |
| Defibrillator, %    |                |                |                 |    |    |    | 11              | 4               | 2               | 54 | 26 | 14 | 2  |

**Legend.** HF<sub>r</sub>EF – heart failure (HF) with reduced left ventricular ejection fraction (LVEF); HF<sub>mid</sub>EF – HF with mid-range LVEF; HF<sub>p</sub>EF – HF with preserved LVEF; HF<sub>m-rec</sub>EF – HF with mid-range LVEF and recovered LVEF; HF<sub>m</sub>EF – HF with mid-range LVEF without recovered LVEF. OPTIMIZE-HF - Organized Program to Initiate Lifesaving Treatment in Hospitalized Patients With Heart Failure; ADHERE - Acute Decompensated Heart Failure Registry; ASCEND-HF – Acute Studies of Nesiritide in Decompensated Heart Failure; BMI – body mass index; HR – heart rate; SBP – systolic blood pressure; DBP – diastolic blood pressure; CAD – coronary artery disease; MI – myocardial infarction; eGFR – estimated glomerular filtration rate; ACE – angiotensin-converting enzyme; ARB – angiotensin receptor blockers; Aldosterone ant. – aldosterone antagonists; CCB – calcium channel blockers. \*values are weighted measures adapted from ref. 1. <sup>†</sup>amlodipine; <sup>‡</sup>ACE inhibitor or ARB; <sup>1</sup>Fonarow GC, et al. Characteristics, treatments, and outcomes of patients with preserved systolic function hospitalized for heart failure: a report from the OPTIMIZE-HF Registry. J Am Coll Cardiol. 2007;50:768-77. <sup>2</sup>Sweitzer NK, et al. Comparison of clinical features and outcomes of patients

hospitalized with heart failure and normal ejection fraction ( $\geq 55\%$ ) versus those with mildly reduced (40% to 55%) and moderately to severely reduced ( $<40\%$ ) fractions. Am J Cardiol. 2008;101:1151-6. <sup>3</sup>Toma M, et al. The relationship between left ventricular ejection fraction and mortality in patients with acute heart failure: insights from the ASCEND-HF Trial. Eur J Heart Fail. 2014;16:334-41.

**Supplemental Figure 1.**

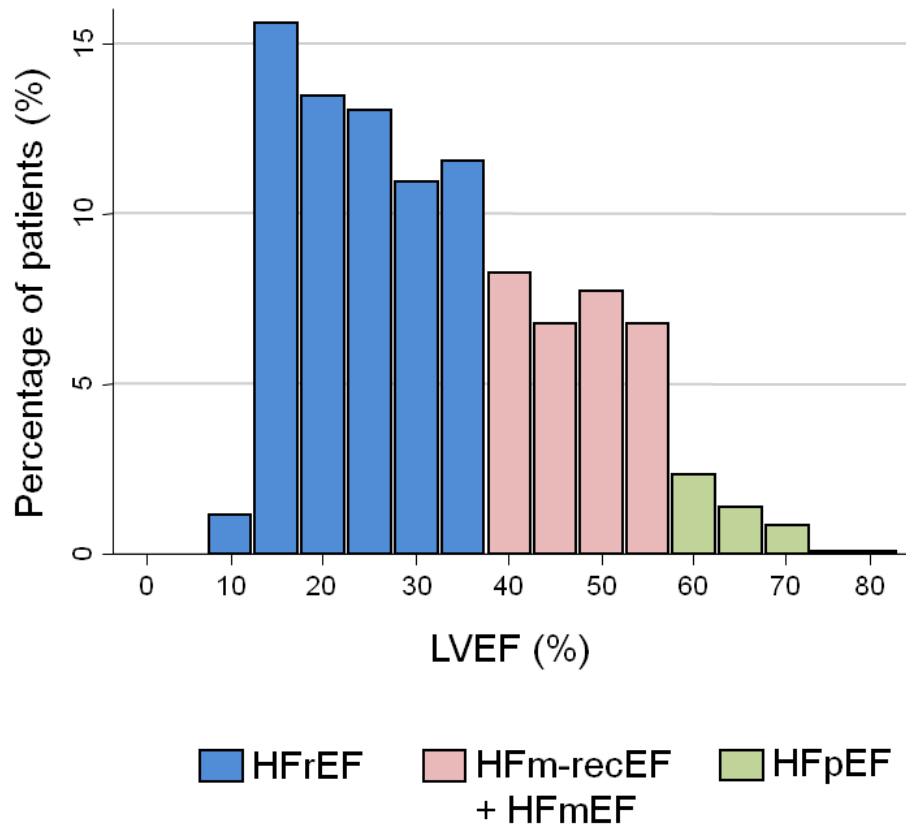

**Legend:** Left ventricular ejection fraction (LVEF) distribution of the studied sample. HFrEF – HF with reduced LVEF; HFm-recEF – HF with mid-range and recovered LVEF; HFmEF – HF with mid-range and without recovered LVEF; HFpEF – heart failure with preserved LVEF.
